# Supplementary material for: 2018 Survey of factors associated with antimicrobial drug use and stewardship practices in adult cows on conventional California dairies: immediate post-Senate Bill 27 impact
Source: PeerJ journal article supplement (doi:10.7717/peerj.11596), 2021-07-13

### Random Forest Model

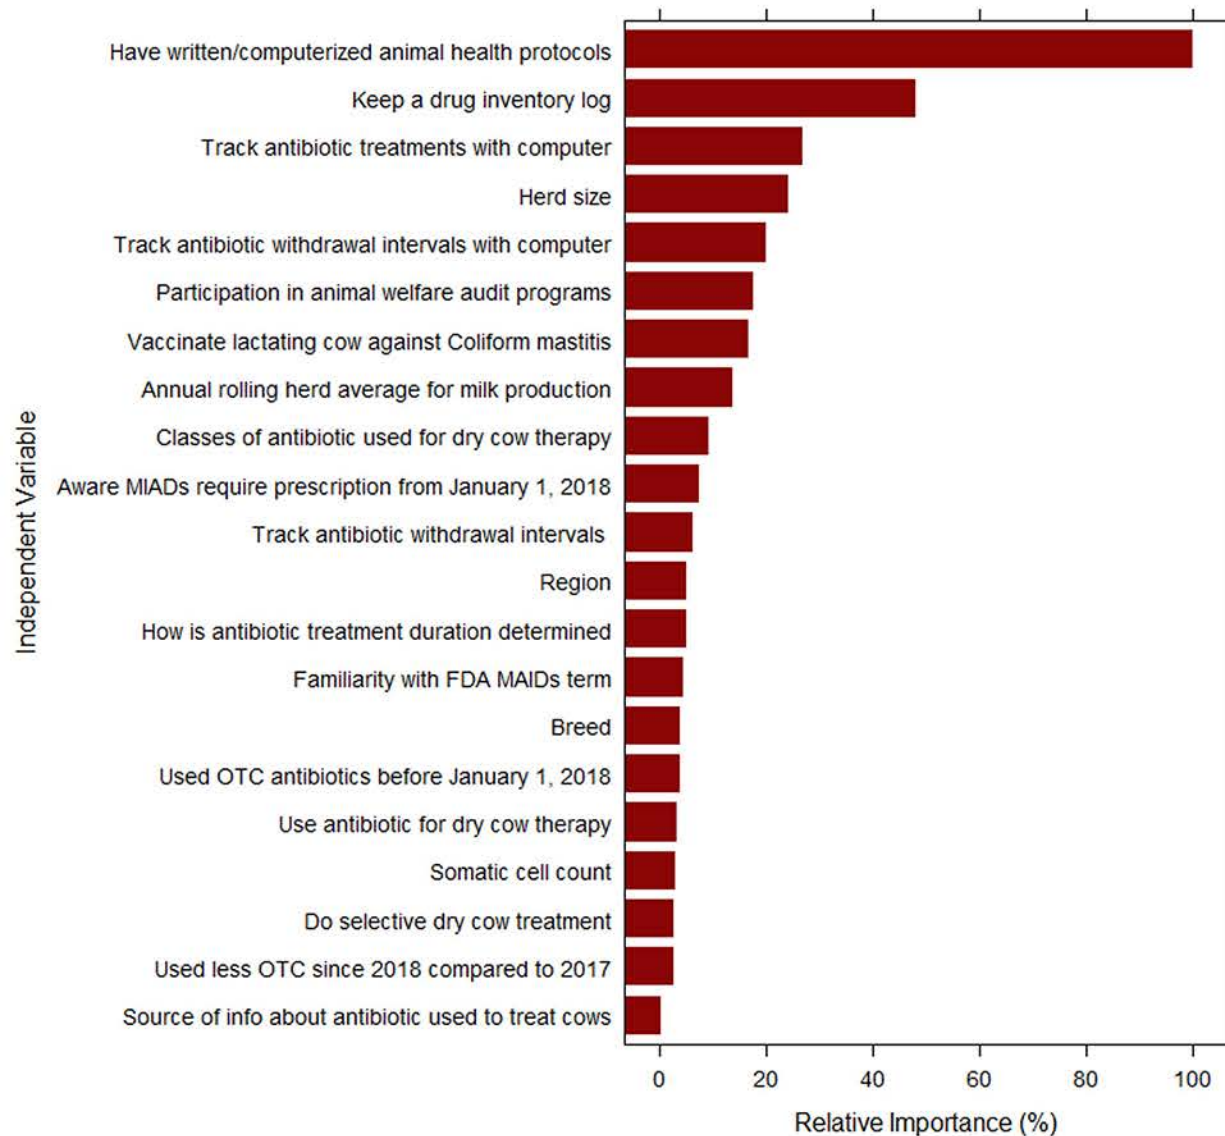

### Gradient Boosting Model

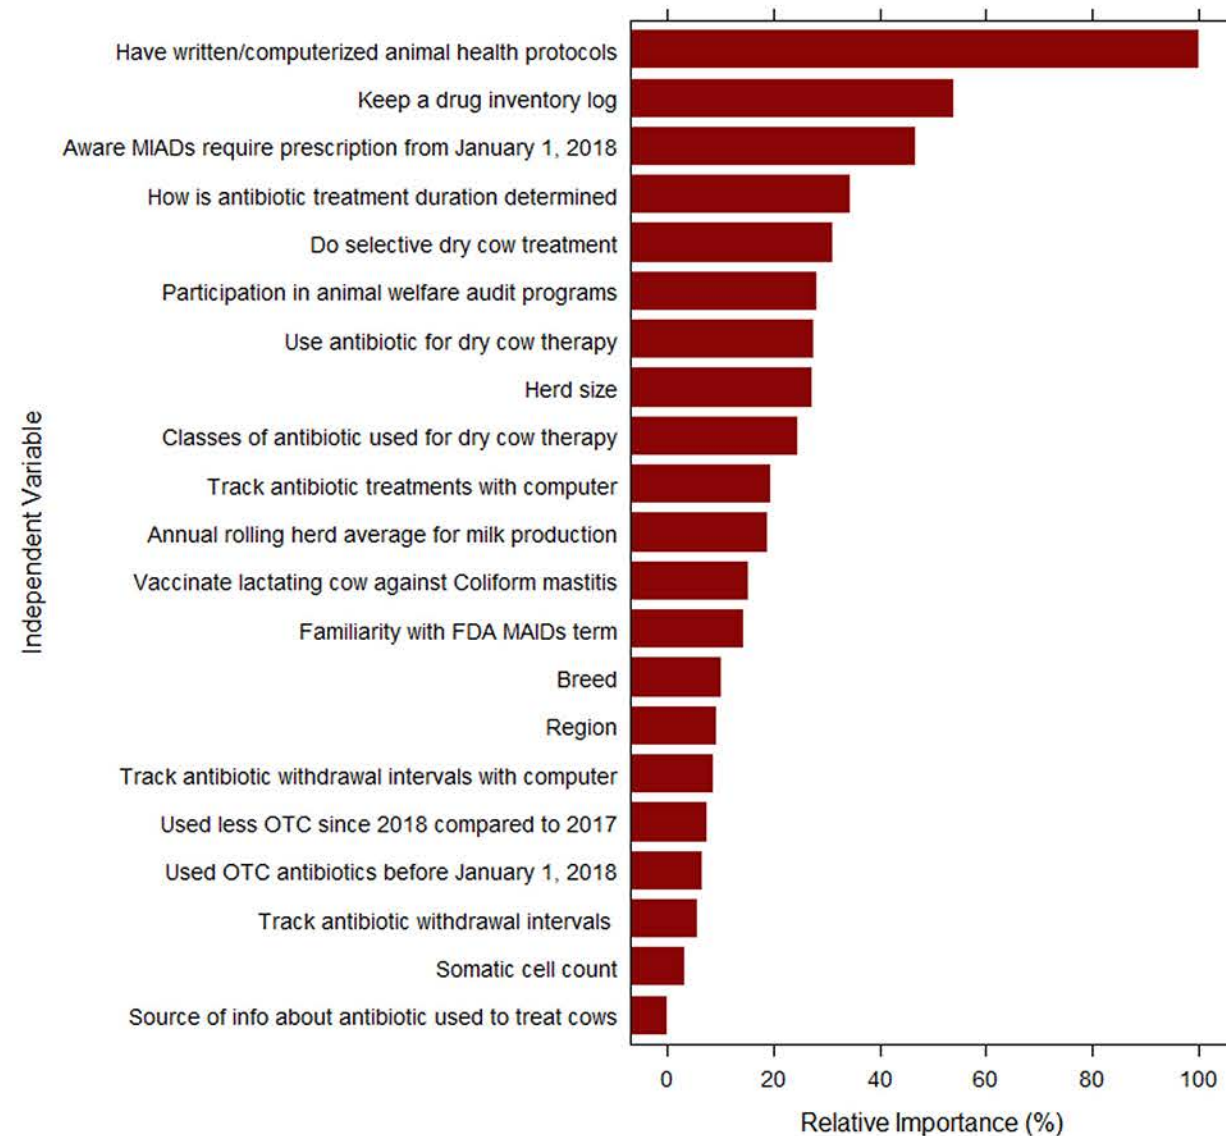

### Decision Tree Model

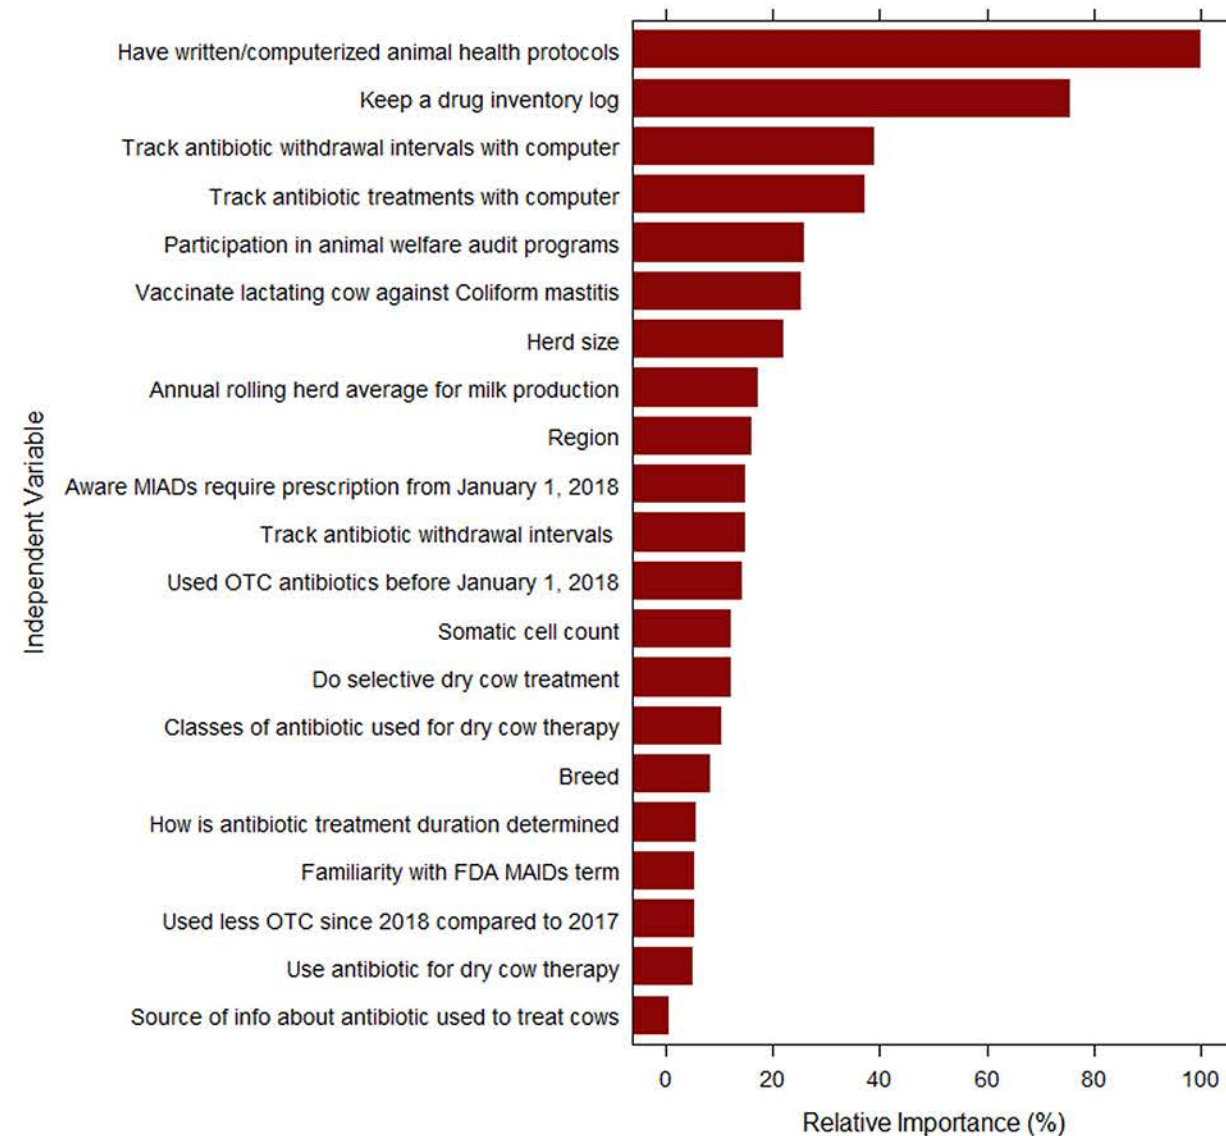

Supplement: Appendix_1.pdf [file Appendix_1.pdf]
